# Supplementary material
Source: ML conference proceedings conference paper supplement (https://openaccess.thecvf.com/content/CVPR_2019/html/Seo_Learning_for_Single-Shot_CVPR_2019_paper.html)
Supplement: Supplementary file 1 [file Seo_Learning_for_Single-Shot_CVPR_2019_supplemental.pdf]

# Learning for Single-Shot Confidence Calibration in Deep Neural Networks through Stochastic Inferences

## Supplementary Document

### A. Stochastic depth as approximate Bayesian inference

ResNet [2] proposes to add skip connections to the network. If  $x_i$  denotes the output of the  $i^{th}$  layer and  $f_i(x)$  represents a typical convolutional transformation, we can obtain the forward propagation

$$\mathbf{x}_i = f_i(\mathbf{x}_{i-1}) + \mathbf{x}_{i-1} \quad (1)$$

and  $f_i(\mathbf{x})$  is commonly defined by

$$f_i(\mathbf{x}) = W_i \cdot \sigma(B(W_i' \cdot \sigma(B(\mathbf{x})))) \quad (2)$$

where  $W_i$  and  $W_i'$  are weight matrices,  $(\cdot)$  denotes convolution, and  $B$  and  $\sigma$  indicates batch normalization and ReLU function, respectively.

ResNet with stochastic depth [3] randomly drops a subset of layers and bypass them with short-cut connection. Let  $e_i \in \{0, 1\}$  denotes a Bernoulli random variable which indicates whether the  $i^{th}$  residual block is active or not. The forward propagation is extended from Equation 1 to

$$\mathbf{x}_i = e_i f_i(\mathbf{x}_{i-1}) + \mathbf{x}_{i-1}. \quad (3)$$

Now we can transform stochasticity from layers to the parameter space as follows:

$$e_i f_i(\mathbf{x}_{i-1}) + \mathbf{x}_{i-1} = e_i (W_i \cdot \sigma(B(W_i' \cdot \sigma(B'(\mathbf{x}_{i-1})))))) + \mathbf{x}_{i-1} \quad (4)$$

$$= e_i^4 (W_i \cdot \sigma(B(W_i' \cdot \sigma(B'(\mathbf{x}_{i-1})))))) + \mathbf{x}_{i-1} \quad (5)$$

$$= e_i^4 \left( W_i \cdot \sigma(\gamma_i \left( \frac{W_i' \cdot \sigma(B'(\mathbf{x}_{i-1})) - \mu_i}{\delta_i} + \beta_i \right)) \right) + \mathbf{x}_{i-1} \quad (6)$$

$$= e_i W_i \cdot \sigma \left( e_i \begin{bmatrix} \gamma_i \\ \beta_i \end{bmatrix}^T \begin{bmatrix} \frac{1}{\delta_i} (e_i W_i' \cdot \sigma(e_i \gamma_i' (\overline{\mathbf{x}_{i-1}} + \beta_i')) - e_i \mu_i) \\ 1 \end{bmatrix} \right) + \mathbf{x}_{i-1} \quad (7)$$

$$= \widetilde{W}_i \cdot \sigma \left( \begin{bmatrix} \widetilde{\gamma}_i \\ \widetilde{\beta}_i \end{bmatrix}^T \begin{bmatrix} \frac{1}{\delta_i} (\widetilde{W}_i' \cdot \sigma(\widetilde{\gamma}_i' (\overline{\mathbf{x}_{i-1}} + \widetilde{\beta}_i')) - e_i \mu_i) \\ 1 \end{bmatrix} \right) + \mathbf{x}_{i-1} \quad (8)$$

$$= f_{\widetilde{W}_i, \widetilde{W}_i', \widetilde{\gamma}_i, \widetilde{\gamma}_i', \widetilde{\beta}_i, \widetilde{\beta}_i'}(\mathbf{x}_{i-1}) = f_{\widetilde{\omega}_i}(\mathbf{x}_{i-1}) \quad (9)$$

$e_i = e_i^4$  since it is a Bernoulli random variable. All stochastic parameters  $\widetilde{\omega}_i = [\widetilde{W}_i, \widetilde{W}_i', \widetilde{\gamma}_i, \widetilde{\gamma}_i', \widetilde{\beta}_i, \widetilde{\beta}_i']$  in this block drop at once or not.

## B. Approximation of KL-Divergence

Let  $\omega \in \mathbb{R}^D$ ,  $p(\omega) = \mathcal{N}(0, \mathbf{I})$  and  $q_\theta(\omega) = \sum_{i=1}^2 e_i \mathcal{N}(\theta_i, \sigma^2 \mathbf{I})$  with a probability vector  $\mathbf{e} = (e_1, e_2)$  where  $e_i \in [0, 1]$  and  $\sum_{i=1}^2 e_i = 1$ . In our work,  $\theta_1$  denotes the deterministic model parameter  $[W_i, W_i', \gamma_i, \gamma_i', \beta_i, \beta_i']$  and  $\theta_2 = 0$ . The KL-Divergence between  $q_\theta(\omega)$  and  $p(\omega)$  is

$$\text{KL}(q_\theta(\omega)||p(\omega)) = \int q_\theta(\omega) \log \frac{q_\theta(\omega)}{p(\omega)} d\omega \quad (10)$$

$$= \int q_\theta(\omega) \log q_\theta(\omega) d\omega - \int q_\theta(\omega) \log p(\omega) d\omega. \quad (11)$$

We can re-parameterize the first entropy term with  $\omega = \theta_i + \sigma \epsilon_i$  where  $\epsilon_i \sim \mathcal{N}(0, \mathbf{I})$ .

$$\int q_\theta(\omega) \log q_\theta(\omega) d\omega = \sum_{i=1}^2 e_i \int \mathcal{N}(\omega; \theta_i, \sigma^2 \mathbf{I}) \log q_\theta(\omega) d\omega \quad (12)$$

$$= \sum_{i=1}^2 e_i \int \mathcal{N}(\epsilon_i; 0, \mathbf{I}) \log q_\theta(\theta_i + \sigma \epsilon_i) d\omega \quad (13)$$

Using  $q_\theta(\theta_i + \sigma \epsilon_i) \approx e_i (2\pi)^{-D/2} \sigma^{-1} \exp(-\frac{1}{2} \epsilon_i^T \epsilon_i)$  for large enough  $D$ ,

$$\int q_\theta(\omega) \log q_\theta(\omega) d\omega \approx \sum_{i=1}^2 e_i \int \mathcal{N}(\epsilon_i; 0, \mathbf{I}) \log (e_i (2\pi)^{-D/2} \sigma^{-1} \exp(-\frac{1}{2} \epsilon_i^T \epsilon_i)) d\omega \quad (14)$$

$$= \sum_{i=1}^2 \frac{e_i}{2} \left( \log e_i - \log \sigma + \int \mathcal{N}(\epsilon_i; 0, \mathbf{I}) \epsilon_i^T \epsilon_i d\epsilon_i - D \log 2\pi \right) \quad (15)$$

$$\approx \sum_{i=1}^2 \frac{e_i}{2} \left( -\log \sigma - D(1 + \log 2\pi) \right) - \frac{1}{2} H(\mathbf{e}). \quad (16)$$

For the second term of the Equation 11,

$$\int q_\theta(\omega) \log p(\omega) d\omega = \sum_{i=1}^2 e_i \int \mathcal{N}(\omega; \theta_i, \sigma^2 \mathbf{I}) \log \mathcal{N}(\omega; 0, \mathbf{I}) d\omega \quad (17)$$

$$= -\frac{1}{2} \sum_{i=1}^2 e_i (\theta_i^T \theta_i + D\sigma). \quad (18)$$

Then we can approximate

$$\text{KL}(q_\theta(\omega)||p(\omega)) \approx \sum_{i=1}^2 \frac{e_i}{2} (\theta_i^T \theta_i + D\sigma - \log \sigma - D(1 + \log 2\pi)) - \frac{1}{2} H(\mathbf{e}). \quad (19)$$

For a more general proof, see [1].

## C. Full Experimental Results

We present the full results of Table 1 in the main paper including all scores from individual CI models with different  $\beta$ 's. Table A and B show the results on Tiny ImageNet and CIFAR-100, respectively.

Table A. Classification accuracy and calibration scores of the models trained with various architectures on Tiny ImageNet supplementing Table 1 in the main paper. This table includes results from all models trained with CI loss with different  $\beta$ 's. In addition to the architectures presented in Table 1, we also include results from ResNet-18.

| Dataset              | Architecture            | Method                  | Accuracy[%]  | ECE          | MCE          | NLL          | Brier Score  |
|----------------------|-------------------------|-------------------------|--------------|--------------|--------------|--------------|--------------|
| Tiny ImageNet        | ResNet-18               | Baseline                | 46.38        | 0.029        | 0.086        | 2.227        | 0.674        |
|                      |                         | CI[ $\beta = 10^{-4}$ ] | 46.48        | <b>0.022</b> | 0.073        | 2.216        | 0.672        |
|                      |                         | CI[ $\beta = 10^{-3}$ ] | 47.20        | <b>0.022</b> | <b>0.060</b> | 2.198        | <b>0.666</b> |
|                      |                         | CI[ $\beta = 0.01$ ]    | 47.03        | <b>0.021</b> | 0.157        | <b>2.193</b> | 0.667        |
|                      |                         | CI[ $\beta = 0.1$ ]     | 47.58        | 0.055        | 0.111        | 2.212        | <b>0.666</b> |
|                      |                         | CI[ $\beta = 1$ ]       | <b>47.92</b> | 0.241        | 0.380        | 2.664        | 0.742        |
|                      |                         | VWCI                    | <b>48.57</b> | 0.026        | <b>0.054</b> | <b>2.129</b> | <b>0.651</b> |
|                      | ResNet-34               | Baseline                | 50.82        | 0.067        | 0.147        | 2.050        | 0.628        |
|                      |                         | CI[ $\beta = 10^{-4}$ ] | 48.89        | 0.132        | 0.241        | 2.257        | 0.668        |
|                      |                         | CI[ $\beta = 10^{-3}$ ] | 50.17        | 0.127        | 0.227        | 2.225        | 0.653        |
|                      |                         | CI[ $\beta = 0.01$ ]    | 49.16        | 0.119        | 0.219        | 2.223        | 0.663        |
|                      |                         | CI[ $\beta = 0.1$ ]     | <b>51.45</b> | <b>0.035</b> | <b>0.171</b> | <b>2.030</b> | <b>0.620</b> |
|                      |                         | CI[ $\beta = 1$ ]       | 50.77        | 0.255        | 0.426        | 2.614        | 0.722        |
|                      |                         | VWCI                    | <b>52.80</b> | <b>0.027</b> | <b>0.076</b> | <b>1.949</b> | <b>0.605</b> |
|                      | VGG-16                  | Baseline                | 46.58        | 0.346        | 0.595        | 4.220        | 0.844        |
|                      |                         | CI[ $\beta = 10^{-4}$ ] | 47.26        | 0.325        | 0.533        | 3.878        | 0.830        |
|                      |                         | CI[ $\beta = 10^{-3}$ ] | <b>47.39</b> | 0.296        | 0.536        | 3.542        | 0.795        |
|                      |                         | CI[ $\beta = 0.01$ ]    | 47.11        | 0.259        | 0.461        | 3.046        | 0.763        |
|                      |                         | CI[ $\beta = 0.1$ ]     | 46.94        | <b>0.122</b> | 0.327        | <b>2.812</b> | <b>0.701</b> |
|                      |                         | CI[ $\beta = 1$ ]       | 45.40        | 0.130        | <b>0.320</b> | 2.843        | 0.717        |
|                      |                         | VWCI                    | <b>48.03</b> | <b>0.053</b> | <b>0.142</b> | <b>2.373</b> | <b>0.659</b> |
|                      | WideResNet-16-8         | Baseline                | 55.92        | 0.132        | 0.237        | 1.974        | 0.593        |
|                      |                         | CI[ $\beta = 10^{-4}$ ] | 55.29        | 0.126        | <b>0.208</b> | 1.987        | 0.598        |
|                      |                         | CI[ $\beta = 10^{-3}$ ] | 55.53        | 0.120        | 0.237        | 1.949        | 0.592        |
| CI[ $\beta = 0.01$ ] |                         | 56.12                   | 0.116        | 0.238        | 1.949        | 0.590        |              |
| CI[ $\beta = 0.1$ ]  |                         | <b>56.38</b>            | <b>0.050</b> | 0.456        | <b>1.851</b> | <b>0.572</b> |              |
| CI[ $\beta = 1$ ]    |                         | 55.66                   | 0.161        | 0.301        | 2.163        | 0.619        |              |
| VWCI                 |                         | <b>56.66</b>            | <b>0.046</b> | <b>0.136</b> | <b>1.866</b> | <b>0.569</b> |              |
| DenseNet-40-12       | Baseline                | <b>42.50</b>            | <b>0.020</b> | 0.154        | <b>2.423</b> | <b>0.716</b> |              |
|                      | CI[ $\beta = 10^{-4}$ ] | 41.20                   | 0.030        | 0.156        | 2.489        | 0.726        |              |
|                      | CI[ $\beta = 10^{-3}$ ] | 41.21                   | 0.036        | 0.122        | 2.514        | 0.735        |              |
|                      | CI[ $\beta = 0.01$ ]    | 40.61                   | <b>0.025</b> | 0.097        | 2.550        | 0.739        |              |
|                      | CI[ $\beta = 0.1$ ]     | 40.67                   | 0.037        | <b>0.094</b> | 2.501        | 0.732        |              |
|                      | CI[ $\beta = 1$ ]       | 37.23                   | 0.169        | 0.291        | 2.975        | 0.810        |              |
|                      | VWCI                    | <b>43.25</b>            | <b>0.025</b> | <b>0.089</b> | <b>2.410</b> | <b>0.712</b> |              |

Table B. Classification accuracy and calibration scores of models trained with various methods on CIFAR-100 supplementing Table 1 in the main paper. This table includes results from all models trained with CI loss with different  $\beta$ 's. In addition to the architectures presented in Table 1, we also include results from ResNet-18.

| Dataset        | Architecture            | Method                  | Accuracy[%]  | ECE          | MCE          | NLL          | Brier Score  |
|----------------|-------------------------|-------------------------|--------------|--------------|--------------|--------------|--------------|
| CIFAR-100      | ResNet-18               | Baseline                | 75.61        | 0.097        | 0.233        | 1.024        | 0.359        |
|                |                         | CI[ $\beta = 10^{-4}$ ] | 75.03        | 0.104        | 0.901        | 1.055        | 0.369        |
|                |                         | CI[ $\beta = 10^{-3}$ ] | 75.51        | 0.087        | 0.219        | <b>0.986</b> | 0.357        |
|                |                         | CI[ $\beta = 0.01$ ]    | 74.95        | 0.069        | <b>0.183</b> | 0.998        | 0.358        |
|                |                         | CI[ $\beta = 0.1$ ]     | <b>75.94</b> | <b>0.065</b> | 0.961        | 1.018        | <b>0.349</b> |
|                |                         | CI[ $\beta = 1$ ]       | 75.61        | 0.340        | 0.449        | 1.492        | 0.475        |
|                |                         | VWCI                    | <b>76.09</b> | <b>0.045</b> | <b>0.128</b> | <b>0.976</b> | <b>0.342</b> |
|                | ResNet-34               | Baseline                | 77.19        | 0.109        | 0.304        | 1.020        | 0.345        |
|                |                         | CI[ $\beta = 10^{-4}$ ] | 77.38        | 0.105        | 0.259        | 1.000        | 0.341        |
|                |                         | CI[ $\beta = 10^{-3}$ ] | 76.98        | 0.101        | 0.261        | 0.999        | 0.344        |
|                |                         | CI[ $\beta = 0.01$ ]    | 77.23        | 0.074        | 0.206        | <b>0.921</b> | 0.331        |
|                |                         | CI[ $\beta = 0.1$ ]     | 77.66        | <b>0.029</b> | <b>0.087</b> | 0.953        | <b>0.321</b> |
|                |                         | CI[ $\beta = 1$ ]       | <b>78.54</b> | 0.362        | 0.442        | 1.448        | 0.461        |
|                |                         | VWCI                    | <b>78.64</b> | <b>0.034</b> | <b>0.089</b> | <b>0.908</b> | <b>0.310</b> |
|                | VGG-16                  | Baseline                | <b>73.78</b> | 0.187        | 0.486        | 1.667        | 0.437        |
|                |                         | CI[ $\beta = 10^{-4}$ ] | 73.19        | 0.189        | 0.860        | 1.679        | 0.446        |
|                |                         | CI[ $\beta = 10^{-3}$ ] | 73.70        | 0.183        | 0.437        | 1.585        | 0.434        |
|                |                         | CI[ $\beta = 0.01$ ]    | <b>73.78</b> | 0.163        | 0.425        | 1.375        | 0.420        |
|                |                         | CI[ $\beta = 0.1$ ]     | 73.68        | <b>0.083</b> | <b>0.285</b> | <b>1.289</b> | <b>0.396</b> |
|                |                         | CI[ $\beta = 1$ ]       | 73.62        | 0.291        | 0.399        | 1.676        | 0.487        |
|                |                         | VWCI                    | <b>73.87</b> | <b>0.098</b> | <b>0.309</b> | <b>1.277</b> | <b>0.391</b> |
|                | WideResNet-16-8         | Baseline                | 77.52        | 0.103        | 0.278        | 0.984        | 0.336        |
|                |                         | CI[ $\beta = 10^{-4}$ ] | 77.04        | 0.109        | 0.280        | 1.011        | 0.345        |
|                |                         | CI[ $\beta = 10^{-3}$ ] | 77.46        | 0.104        | 0.272        | 0.974        | 0.339        |
|                |                         | CI[ $\beta = 0.01$ ]    | <b>77.53</b> | <b>0.074</b> | <b>0.211</b> | <b>0.931</b> | <b>0.327</b> |
|                |                         | CI[ $\beta = 0.1$ ]     | 77.23        | 0.085        | 0.239        | 1.015        | 0.336        |
|                |                         | CI[ $\beta = 1$ ]       | 77.48        | 0.295        | 0.485        | 1.378        | 0.434        |
|                |                         | VWCI                    | <b>77.74</b> | <b>0.038</b> | <b>0.101</b> | <b>0.891</b> | <b>0.314</b> |
| DenseNet-40-12 | Baseline                | 65.91                   | 0.074        | 0.134        | 1.238        | 0.463        |              |
|                | CI[ $\beta = 10^{-4}$ ] | <b>66.20</b>            | 0.064        | 0.141        | 1.236        | 0.463        |              |
|                | CI[ $\beta = 10^{-3}$ ] | 63.61                   | 0.086        | 0.177        | 1.360        | 0.496        |              |
|                | CI[ $\beta = 0.01$ ]    | 65.13                   | 0.052        | 0.127        | 1.249        | 0.471        |              |
|                | CI[ $\beta = 0.1$ ]     | 65.86                   | <b>0.019</b> | <b>0.053</b> | <b>1.206</b> | <b>0.456</b> |              |
|                | CI[ $\beta = 1$ ]       | 62.82                   | 0.127        | 0.193        | 1.510        | 0.523        |              |
|                | VWCI                    | <b>67.45</b>            | <b>0.026</b> | <b>0.094</b> | <b>1.161</b> | <b>0.439</b> |              |

## References

- [1] Yarin Gal and Zoubin Ghahramani. Dropout as a bayesian approximation: Representing model uncertainty in deep learning. In *ICML*, 2016. 2
- [2] Kaiming He, Xiangyu Zhang, Shaoqing Ren, and Jian Sun. Deep residual learning for image recognition. In *CVPR*, 2016. 1
- [3] Gao Huang, Yu Sun, Zhuang Liu, Daniel Sedra, and Kilian Q Weinberger. Deep networks with stochastic depth. In *ECCV*, 2016. 1
